# Supplementary figures and images for: Recruitment of endoplasmic reticulum-targeted and cytosolic mRNAs into membrane-associated stress granules
Source: PubMed Central journal article supplement — RNA. 2021 Oct;27(10):1241–56. doi: 10.1261/rna.078858.121 (PMC8456999; doi:10.1261/rna.078858.121), 2021-10

Unfractionated

Digitonin

DDM

Tubulin

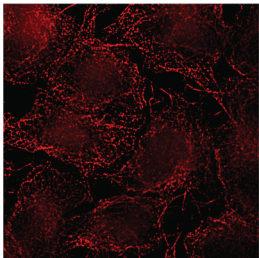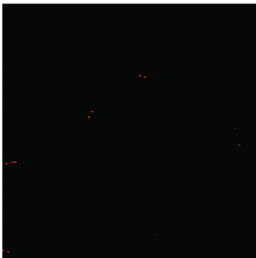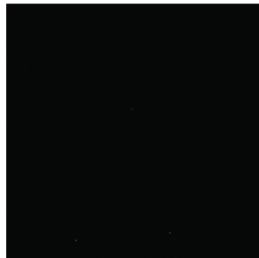

TRAPa

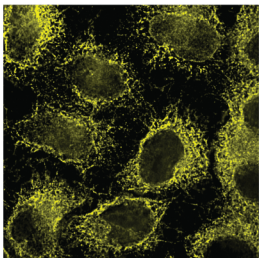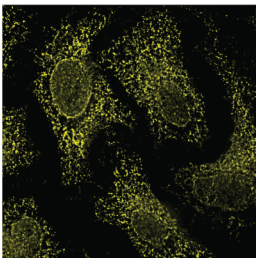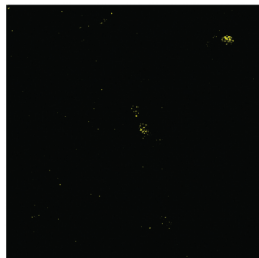

DAPI

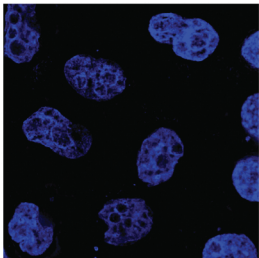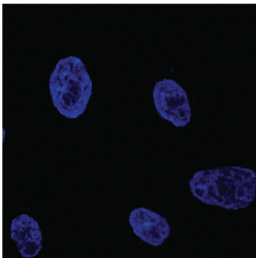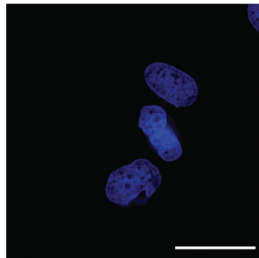

Supplement: supp_078858.121_Supplemental_Figure_1.pdf [file supp_078858.121_Supplemental_Figure_1.pdf]
